# Supplementary material
Source: publisher figshare collection journal article supplement (https://sage.figshare.com/ndownloader/files/10812305)
Supplement: Supplementary file 1 [file 10812305]

APPENDIX

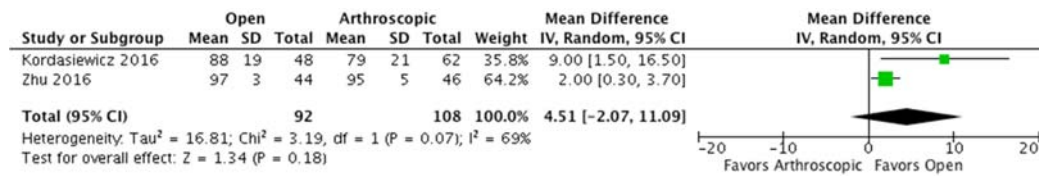

Figure 1 - Forest plot of Rowe Score

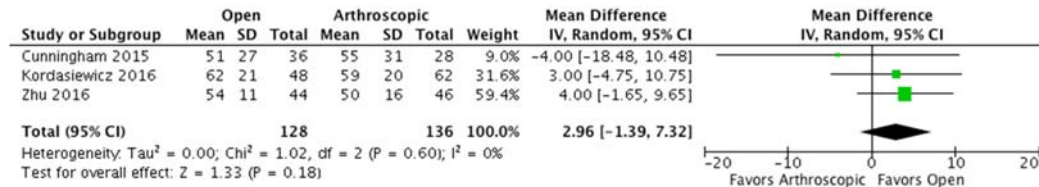

Figure 2 - Forest plot of External Range of Motion with the Elbow at the Side

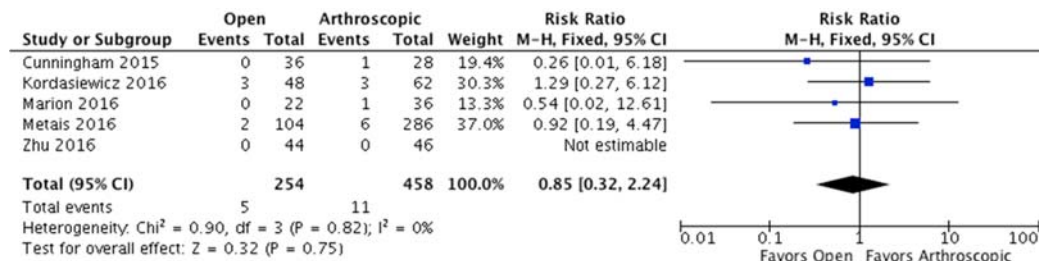

Figure 3 - Forest plot of Total Recurrent Instability

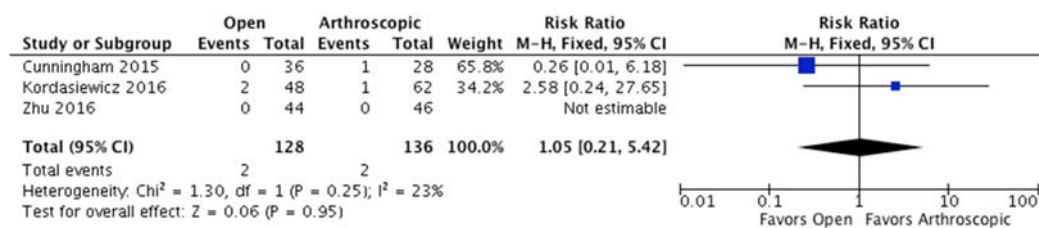

Figure 4 - Forest plot of Recurrent Dislocations

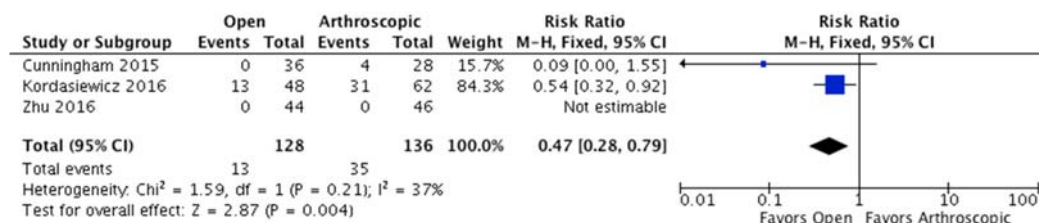

Figure 5 - Forest plot of Persistent Apprehension

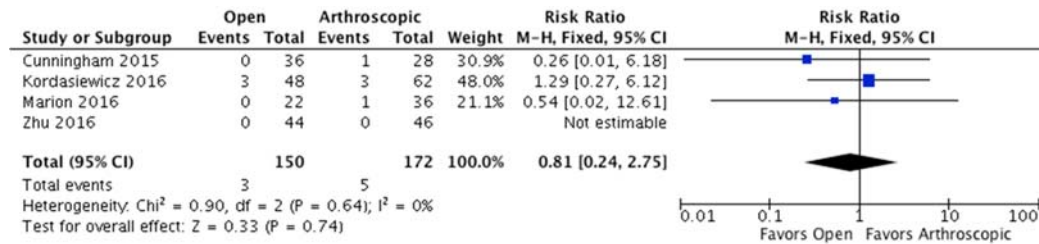

Figure 6 - Forest plot of Revisions due to Recurrent Instability

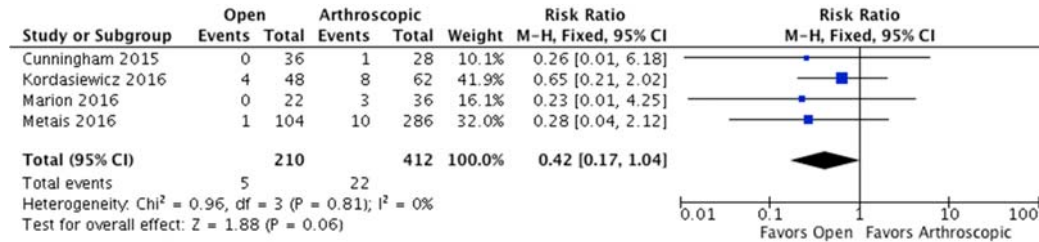

Figure 7 - Forest plot of Total Revisions

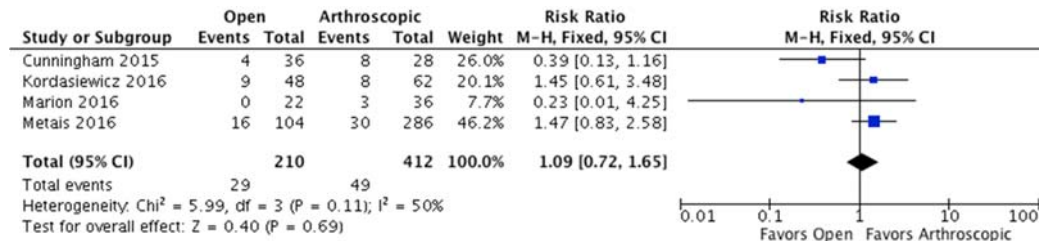

Figure 8 - Forest plot of Total Complications

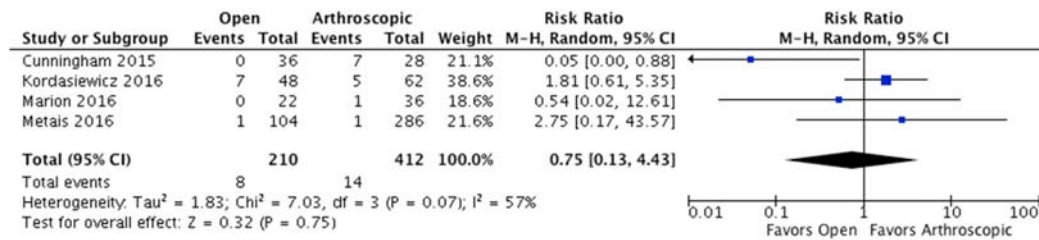

Figure 9 - Forest plot of Graft Complications

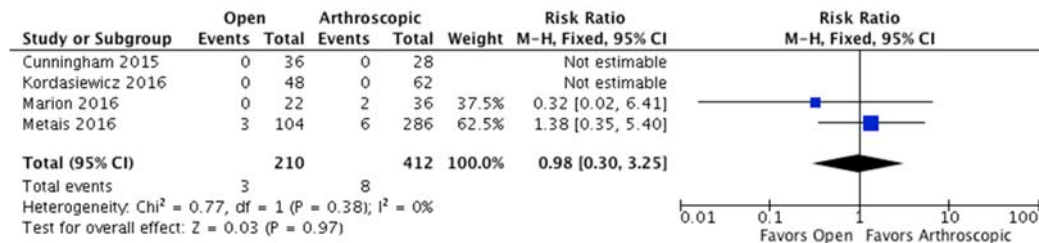

Figure 10 - Forest plot of Screw Complications

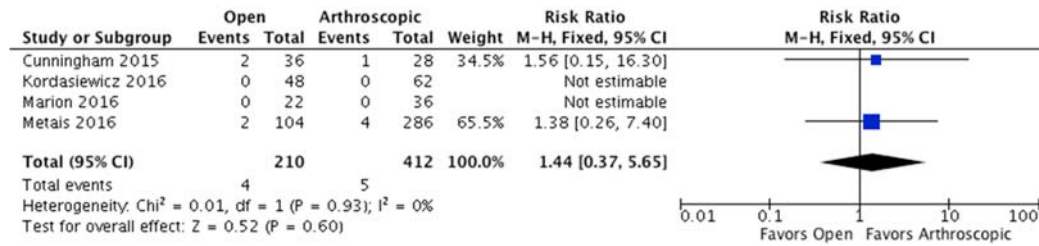

Figure 11 - Forest plot of Wound Infections

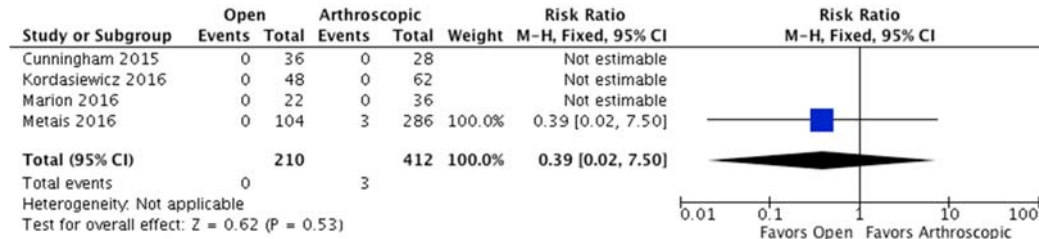

Figure 12 - Forest plot of Neurological Complications

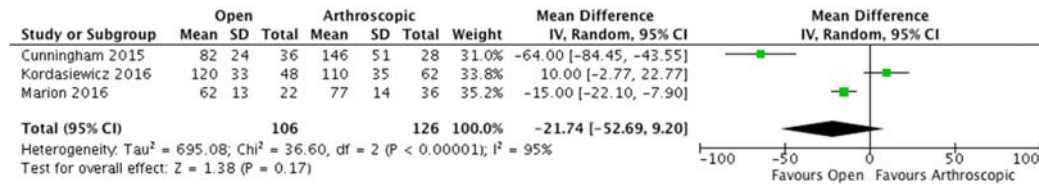

Figure 13 - Forest plot of Operation Time
